# Supplementary material for: Multivalent peptidic linker enables identification of preferred sites of conjugation for a potent thialanstatin antibody drug conjugate
Source: PubMed Central journal article supplement (PMC5448779; doi:10.1371/journal.pone.0178452), 2017-05-30
Supplement: pone.0178452.s002.pdf [file pone.0178452.s002.pdf]

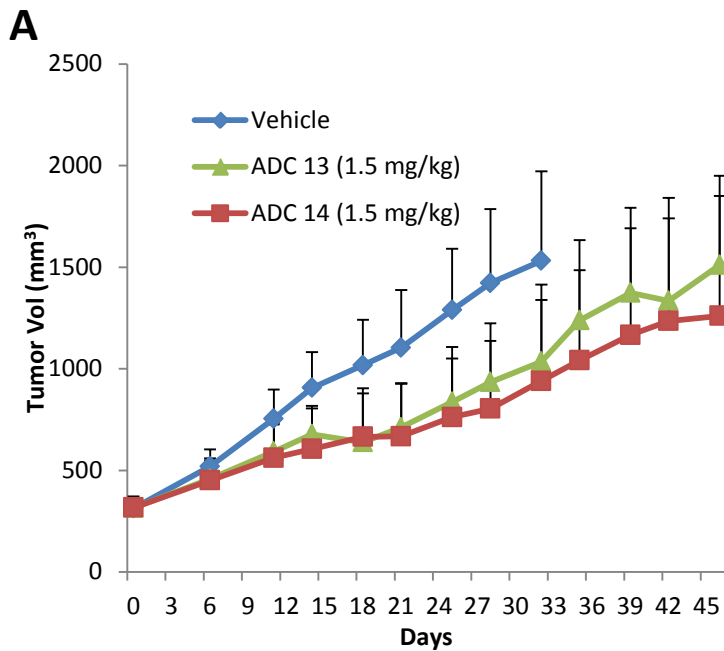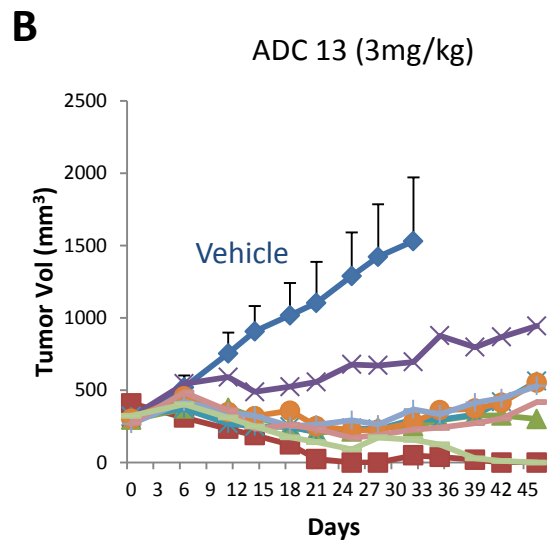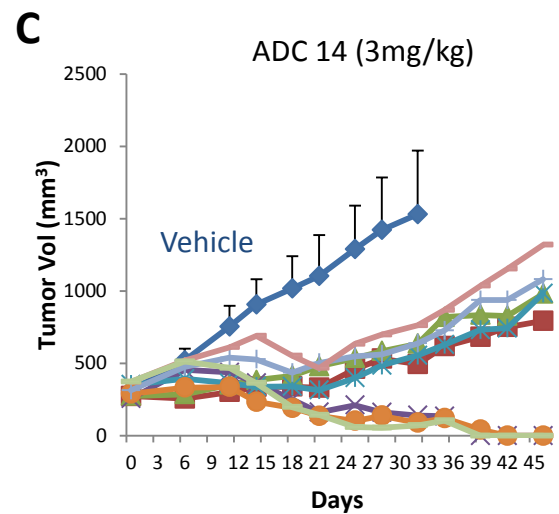

**S1 Fig: In vivo efficacy of thailanstatin MPP trastuzumab ADCs in N87 gastric cancer xenograft model** (A) In vivo efficacy of MPP-ADC 13 and MPP-ADC 14 in N87 gastric cancer xenograft model dosed at 1.56 mg/kg (q4d x 4). (B) Individual mouse in vivo efficacy of MPP-ADC 13 in N87 gastric cancer xenograft model dosed at 3 mg/kg (q4d x 4) showing two complete regression. (C) Individual mouse in vivo efficacy of MPP **ADC14** in N87 gastric cancer xenograft model dosed at 3 mg/kg (q4d x 4) showing three complete regression.
