# Supplementary material for: Multivalent peptidic linker enables identification of preferred sites of conjugation for a potent thialanstatin antibody drug conjugate
Source: PubMed Central journal article supplement (PMC5448779; doi:10.1371/journal.pone.0178452), 2017-05-30
Supplement: pone.0178452.s004.pdf [file pone.0178452.s004.pdf]

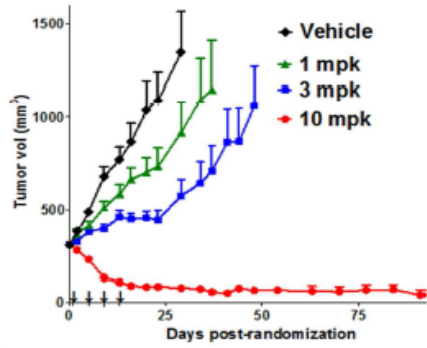

**S3 Fig:** *In vivo* efficacy of T-DM1 in N87 gastric cancer xenograft model dosed at 1, 3 and 10 mg/kg (q4d x 4).
